# Supplementary material for: Association of a Mediterranean Diet With Outcomes for Patients Treated With Immune Checkpoint Blockade for Advanced Melanoma
Source: PubMed Central journal article supplement (PMC9936383; doi:10.1001/jamaoncol.2022.7753), 2023-02-16
Supplement: jamaoncol-e227753-s002.pdf [file jamaoncol-e227753-s002.pdf]

## Data Sharing Statement

Bolte. Association of a Mediterranean Diet With Outcomes for Patients Treated With Immune Checkpoint Blockade for Advanced Melanoma. *JAMA Oncol.* Published February 16, 2023. doi:10.1001/jamaoncol.2022.7753

### Data

**Data available:** Yes

**Data types:** Deidentified participant data

**How to access data:** All relevant data supporting the key findings of this study are available within the article and the supplementary files. Other data are available from the corresponding author upon reasonable requests ([r.k.weersma@umcg.nl](mailto:r.k.weersma@umcg.nl))

**When available:** With publication

### Supporting Documents

**Document types:** Statistical/analytic code

**How to access documents:** All statistical analysis scripts are written in R and can be found here: <https://github.com/WeersmaLabIBD>.

**When available:** With publication

### Additional Information

**Who can access the data:** All relevant data supporting the key findings of this study are available within the article and the supplementary files. Other data are available from the corresponding author upon reasonable requests.

**Types of analyses:** Joining of datasets e.g. in a meta-analysis or for replication in independent cohorts.

**Mechanisms of data availability:** All relevant data supporting the key findings of this study are available within the article and the supplementary files. Other data are available from the corresponding author upon reasonable requests.
